# Supplementary material
Source: publisher site journal article supplement (https://www.dovepress.com/article/576457)
Supplement: Supplementary file 1 [file 576457%20Revised%20Supplementary.docx]

**Supplementary content S1: The phenotype of M0 BMDM and IL-4-stimulated M2 BMDM**

In order to properly interpret the data achieved from co-culture experiments, we checked the phenotype of cultured BMDM. Corresponding cells were co-cultured with TANs. Most cells of BMDM, considered in the current paper as M0 cells, did not exhibit typical markers for M1 or M2 cells (63% of cells were CD86-CD206-), 21.2.% of cells were recognized as CD86+CD206- M1 cells, and about 12.5% cells had CD86-CD206+ M2 phenotype (Figure S1.A). To mimic the phenotype of tumor-associated macrophages (TAM), BMDM were polarized with IL-4 toward the M2 phenotype. In the obtained population, 30% of cells exhibited CD86-CD206+ M2 phenotype, 11.9% of cells exhibited CD86+CD206- M1 markers, and about 50% did not express analysed markers for M1 or M2 cells (CD86-CD206-) (Figure S1.B).
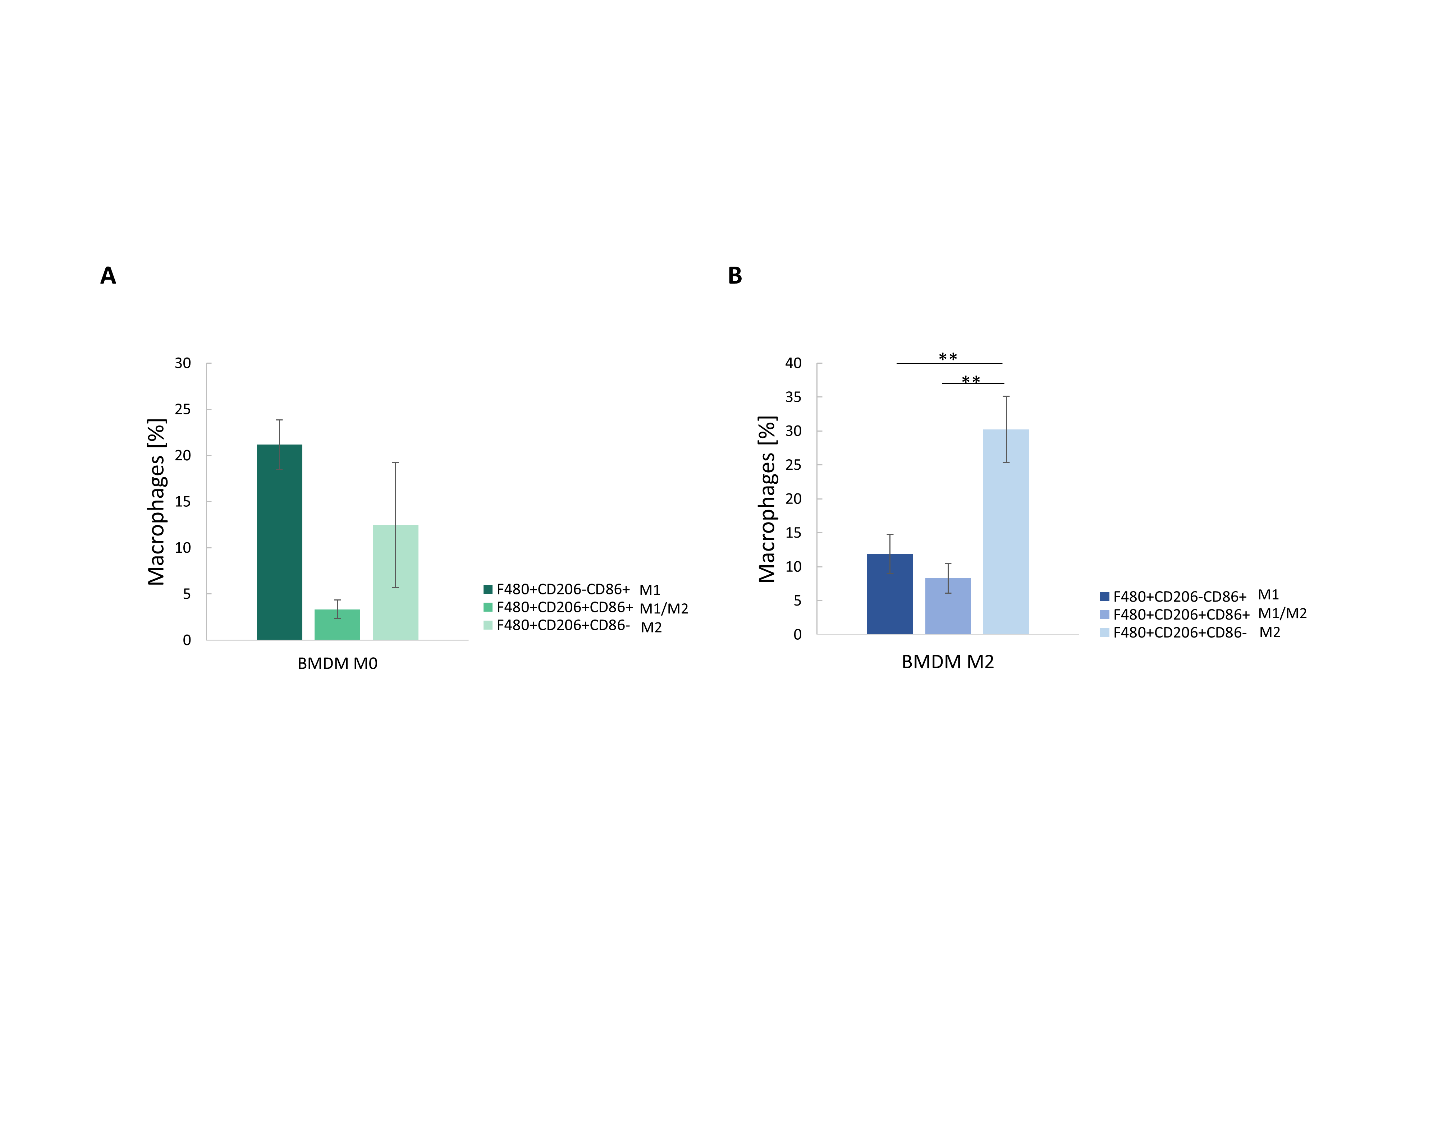


**Figure S1. A, B.** The phenotype of M0 BMDM and M2 BMDM was analysed with flow cytometry following 24h cultivation. The unstimulated BMDM cells were marked as M0, IL-4-treated BMDM were marked as M2 BMDM. The statistical significance: ANOVA with Tukey's HSD post-hoc test, ***p*<0.01. Data from 2 independent experiments are shown, n=3, mean±SEM.

**Supplementary content S2: STING agonist-induced switch of BALB/c-derived BMDM phenotype**

STING agonists revealed great potential to polarize macrophages toward M1 pro-inflammatory (anti-tumor) phenotype (Figure S2.). Usage of 5μM cGAMP led to the polarization of BMDM cells toward M1-like cells. Following cGAMP treatment, we noted a 2.4-fold decrease in CD206+CD86- cells, which corresponds to M2 populations. At the same time, following cGAMP treatment, we observed 2.7-fold increase in M1 cells marked as CD206-CD86+. We also noted a high percentage of CD206-MHC-II+ BMDM cells, which number did not change statistically after cGAMP administration.


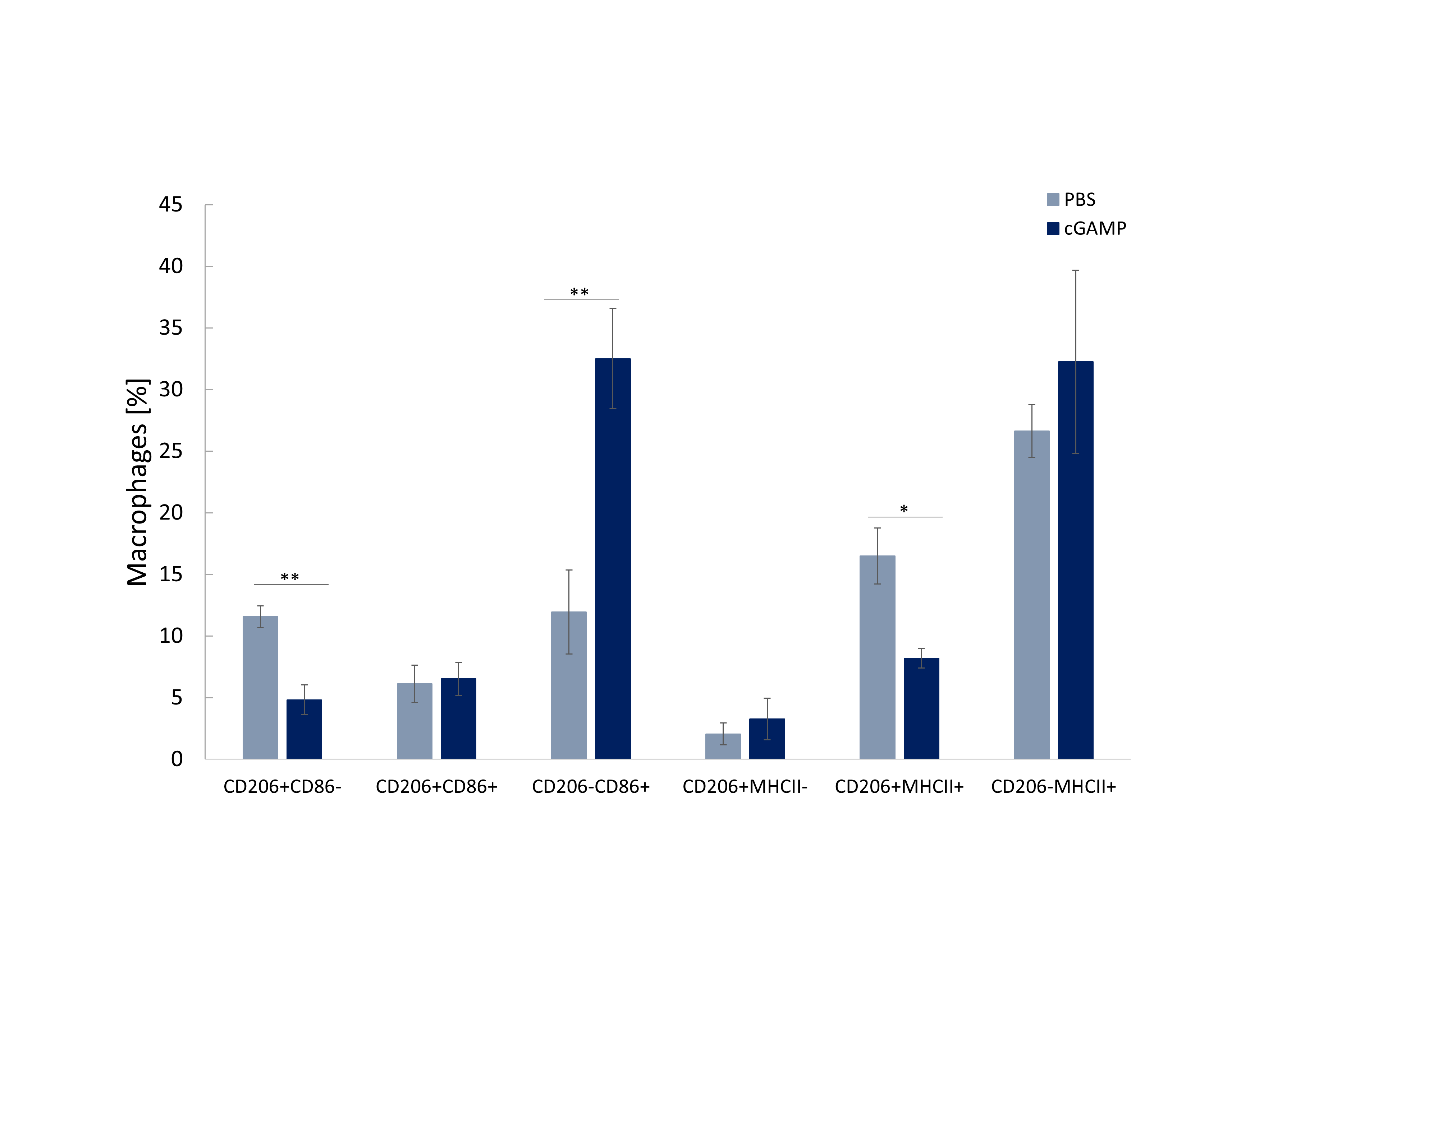


**Figure S2.** The phenotype of M0 BMDM treated for 24h with 5μM cGAMP was analysed with flow cytometry. The statistical significance: CD206+MHCII+ Mann–Whitney U test **p*<0.05, CD206+CD86-; CD206+CD86- Student's *t*-test ***p*<0.01. Data from 1 independent experiment are shown, n=4, mean±SEM.
